# Supplementary material for: Salivary Proteomics Markers for Preclinical Sjögren’s Syndrome: A Pilot Study
Source: Biomolecules. 2022 May 24;12(6):738. doi: 10.3390/biom12060738 (PMC9221050; doi:10.3390/biom12060738)
Supplement: Supplementary file 1 [file biomolecules-12-00738-s001.zip › TableS3.xlsx]

## Sheet: 166_QuantifiedProteins
Protein	AC	Description	mean_CTRL	sd_CTRL	mean_SSA+	sd_SSA+	mean_pSS	sd_pSS	FC_SSA+vsCTRL	p.val_SSA+vsCTRL	FC_pSSvsCTRL	p.val_pSSvsCTRL
sp|Q9HC84|MUC5B_HUMAN	Q9HC84	Mucin-5B	80962500	5.1013e+07	3.59533e+07	2.2009e+07	3.79597e+07	2.11914e+07	0.444074	0.104895	0.468855	0.0754148
sp|P02788|TRFL_HUMAN	P02788	Lactotransferrin	2.68096e+06	2.54921e+06	6.76708e+06	5.16215e+06	7.60145e+06	7.41918e+06	2.52413	0.0498834	2.83535	0.0908417
sp|P01833|PIGR_HUMAN	P01833	Polymeric immunoglobulin receptor	14776250	9.92491e+06	12473750	4.29316e+06	1.28082e+07	4.96112e+06	0.844176	0.645377	0.866809	0.716784
sp|P01876|IGHA1_HUMAN	P01876	Immunoglobulin heavy constant alpha...	2.39392e+07	1.66174e+07	3.67583e+07	7.82776e+06	3.69555e+07	1.24532e+07	1.53549	0.0829837	1.54372	0.0327591
sp|P0DUB6|AMY1A_HUMAN	P0DUB6	Alpha-amylase 1A	1.27096e+07	8.6106e+06	1.00133e+07	7.89052e+06	7.81082e+06	6.09092e+06	0.787854	0.720901	0.614561	0.237543
sp|P02768|ALBU_HUMAN	P02768	Albumin	859167	347101	1.24758e+06	705270	1.05015e+06	720887	1.45209	0.278632	1.22229	0.903892
sp|P05164|PERM_HUMAN	P05164	Myeloperoxidase	1.66396e+06	1.90312e+06	3843750	2.37716e+06	3.21185e+06	4.01216e+06	2.31	0.0206682	1.93025	0.395041
sp|P01834|IGKC_HUMAN	P01834	Immunoglobulin kappa constant	1.15946e+07	7.73192e+06	8.83583e+06	3.19936e+06	7.61697e+06	2.44314e+06	0.762066	0.645377	0.656942	0.395041
sp|P01871|IGHM_HUMAN	P01871	Immunoglobulin heavy constant mu	1.09808e+06	1.00538e+06	2017250	1.00602e+06	3.27909e+06	5.83068e+06	1.83706	0.0281274	2.98619	0.12884
sp|Q9UGM3|DMBT1_HUMAN	Q9UGM3	Deleted in malignant brain tumors 1...	3727250	2.54706e+06	6.41617e+06	6.39983e+06	4.83027e+06	5.18715e+06	1.72142	0.798446	1.29593	0.903892
sp|P19013|K2C4_HUMAN	P19013	Keratin, type II cytoskeletal 4	304117	643479	34262.5	10509.8	45363.6	23032	0.112662	0.0829837	0.149165	0.272287
sp|Q8TDL5|BPIB1_HUMAN	Q8TDL5	BPI fold-containing family B member...	1.81458e+06	1.95359e+06	686721	659714	1.4032e+06	2.12641e+06	0.378445	0.0829837	0.773292	0.0908417
sp|Q06830|PRDX1_HUMAN	Q06830	Peroxiredoxin-1	21458.3	9578.23	17646.6	7561.54	29584.8	21400.7	0.822365	0.505361	1.37871	0.544759
sp|P13646|K1C13_HUMAN	P13646	Keratin, type I cytoskeletal 13	571796	1.24502e+06	71691.7	27128.7	114909	63695.5	0.12538	0.014763	0.200962	0.264758
sp|P02787|TRFE_HUMAN	P02787	Serotransferrin	98333.3	42953.5	133988	75213.2	110755	56659.7	1.36258	0.194872	1.12632	0.544759
sp|P60709|ACTB_HUMAN	P60709	Actin, cytoplasmic 1	3195250	3.44282e+06	2864750	2.17139e+06	2.23633e+06	1.04024e+06	0.896565	0.878477	0.699893	1
sp|P01023|A2MG_HUMAN	P01023	Alpha-2-macroglobulin	833875	551985	1.08446e+06	1.13471e+06	639258	308980	1.3005	0.878477	0.766611	0.599878
sp|Q96DR5|BPIA2_HUMAN	Q96DR5	BPI fold-containing family A member...	823458	608837	2.06421e+06	2.10202e+06	2.80555e+06	4.59317e+06	2.50676	0.130381	3.40703	0.310047
sp|Q08380|LG3BP_HUMAN	Q08380	Galectin-3-binding protein	685333	218882	544146	167697	694273	328879	0.793987	0.194872	1.01304	0.657405
sp|P04083|ANXA1_HUMAN	P04083	Annexin A1	885542	741112	702000	636524	781667	716224	0.792735	0.382284	0.882699	0.544759
sp|P35579|MYH9_HUMAN	P35579	Myosin-9	287508	194827	153300	74711.7	138709	60595.5	0.533202	0.130381	0.482452	0.0620253
sp|P02647|APOA1_HUMAN	P02647	Apolipoprotein A-I	283646	220298	360288	204103	496861	567799	1.2702	0.505361	1.75169	0.544759
sp|P02538|K2C6A_HUMAN	P02538	Keratin, type II cytoskeletal 6A	63790	66533.1	10888.8	4463.2	13232.1	6109.41	0.170697	0.014763	0.207433	0.0327591
sp|A0A0C4DH35|HV335_HUMAN	A0A0C4DH35	Probable non-functional immunoglobu...	35811.2	37850.5	38197.9	12002.1	46933.3	30146.3	1.06665	0.328205	1.31058	0.206001
sp|P01591|IGJ_HUMAN	P01591	Immunoglobulin J chain	2.64179e+07	1.72657e+07	2.60708e+07	6.10946e+06	2.87212e+07	9.68925e+06	0.986862	0.95913	1.08719	0.599878
sp|B9A064|IGLL5_HUMAN	B9A064	Immunoglobulin lambda-like polypept...	2.33058e+06	1.61908e+06	3.55442e+06	893542	4.87758e+06	3.92257e+06	1.52512	0.130381	2.09286	0.0408827
sp|P08311|CATG_HUMAN	P08311	Cathepsin G	1.12754e+06	990876	1254500	858145	1.69549e+06	2.19927e+06	1.1126	0.645377	1.50371	0.777989
sp|P62805|H4_HUMAN	P62805	Histone H4	2.32474e+06	3.54628e+06	5.93158e+06	5.88292e+06	5.84493e+06	7.22589e+06	2.5515	0.278632	2.51423	0.206001
sp|P02675|FIBB_HUMAN	P02675	Fibrinogen beta chain	191308	115043	375775	238994	298345	214431	1.96424	0.130381	1.5595	0.310047
sp|Q08188|TGM3_HUMAN	Q08188	Protein-glutamine gamma-glutamyltra...	429325	215948	224475	115152	472100	377143	0.522856	0.0649573	1.09963	0.777989
sp|P12273|PIP_HUMAN	P12273	Prolactin-inducible protein	1.81229e+06	1.80378e+06	659125	249332	547288	254057	0.363697	0.0206682	0.301987	0.00359874
sp|P58876|H2B1D_HUMAN	P58876	Histone H2B type 1-D	76751.7	86000.7	124211	98574.3	143542	159325	1.61835	0.278632	1.87021	0.492022
sp|P01859|IGHG2_HUMAN	P01859	Immunoglobulin heavy constant gamma...	136621	61447.3	166612	70983.1	199879	85466.2	1.21952	0.505361	1.46302	0.0908417
sp|P05109|S10A8_HUMAN	P05109	Protein S100-A8	5.56254e+06	6.17169e+06	4272375	1.82288e+06	3.55121e+06	2.68273e+06	0.768062	0.382284	0.638415	0.777989
sp|P01877|IGHA2_HUMAN	P01877	Immunoglobulin heavy constant alpha...	10063250	6.56292e+06	1.5376e+07	3.4626e+06	1.31576e+07	6.26164e+06	1.52793	0.130381	1.30749	0.237543
sp|Q9Y6R7|FCGBP_HUMAN	Q9Y6R7	IgGFc-binding protein	179483	132829	234021	311518	230009	290833	1.30386	0.95913	1.28151	0.457193
sp|Q96DA0|ZG16B_HUMAN	Q96DA0	Zymogen granule protein 16 homolog ...	1.37658e+06	934003	1.88396e+06	1.71774e+06	1.962e+06	2.22926e+06	1.36858	0.720901	1.42527	0.967849
sp|P03973|SLPI_HUMAN	P03973	Antileukoproteinase	1.55267e+06	1.28323e+06	3.05579e+06	2.49787e+06	3.05294e+06	2.93057e+06	1.96809	0.194872	1.96626	0.237543
sp|Q9BTM1|H2AJ_HUMAN	Q9BTM1	Histone H2A.J	1.10022e+06	1.57172e+06	4.81175e+06	3.44226e+06	3.91252e+06	4.16867e+06	4.37344	0.0379176	3.55613	0.10865
sp|P12429|ANXA3_HUMAN	P12429	Annexin A3	343721	238760	292617	271174	192918	95511.7	0.851321	0.645377	0.561264	0.17737
sp|P01036|CYTS_HUMAN	P01036	Cystatin-S	4.09263e+06	7.87847e+06	520375	570152	618173	798827	0.127149	0.104895	0.151045	0.0620253
sp|P00738|HPT_HUMAN	P00738	Haptoglobin	127804	82701.3	151921	77699.4	140358	107788	1.1887	0.573737	1.09822	1
sp|P14618|KPYM_HUMAN	P14618	Pyruvate kinase PKM	180388	95828.9	210042	117033	217076	113816	1.16439	0.505361	1.20339	0.599878
sp|P04406|G3P_HUMAN	P04406	Glyceraldehyde-3-phosphate dehydrog...	102154	49859	67937.5	28585.7	52236.4	24913.7	0.665049	0.194872	0.511348	0.0327591
sp|Q71DI3|H32_HUMAN	Q71DI3	Histone H3.2	61383.3	45262.2	90890.4	107476	35892.7	22944.4	1.4807	0.95913	0.584731	0.151756
sp|P05107|ITB2_HUMAN	P05107	Integrin beta-2	162079	98359.4	122796	94845.7	101504	48648.2	0.757629	0.645377	0.62626	0.151756
sp|P06702|S10A9_HUMAN	P06702	Protein S100-A9	1.72758e+06	1.62994e+06	699458	298861	728491	636359	0.404877	0.104895	0.421682	0.0157445
sp|P23280|CAH6_HUMAN	P23280	Carbonic anhydrase 6	699708	588245	766604	956602	670006	864239	1.09561	0.382284	0.95755	0.395041
sp|P01780|HV307_HUMAN	P01780	Immunoglobulin heavy variable 3-7	403904	319090	661812	592369	688630	681470	1.63854	0.234499	1.70493	0.310047
sp|P04114|APOB_HUMAN	P04114	Apolipoprotein B-100	77308.3	73190.1	54729.2	26562.9	55472.1	33335.8	0.707934	0.798446	0.717544	0.967849
sp|P04040|CATA_HUMAN	P04040	Catalase	85712.5	30450	130267	40566.5	85645.2	33904.3	1.51981	0.0281274	0.999214	0.903892
sp|Q8N4F0|BPIB2_HUMAN	Q8N4F0	BPI fold-containing family B member...	264267	209256	100850	27401.1	135273	99048.8	0.381622	0.0829837	0.51188	0.17737
sp|P13796|PLSL_HUMAN	P13796	Plastin-2	210100	267204	172596	70839.3	186327	107950	0.821494	0.382284	0.88685	0.395041
sp|P10909|CLUS_HUMAN	P10909	Clusterin	67804.2	32341.5	65741.7	21018.5	103491	77802.2	0.969582	1	1.52632	0.442142
sp|P02679|FIBG_HUMAN	P02679	Fibrinogen gamma chain	69729.2	43217.4	197829	125543	173255	128143	2.83711	0.014763	2.48468	0.0259321
sp|P61626|LYSC_HUMAN	P61626	Lysozyme C	147050	34220.2	222833	154147	181912	130719	1.51536	0.441803	1.23708	0.840385
sp|P01857|IGHG1_HUMAN	P01857	Immunoglobulin heavy constant gamma...	447292	241807	777042	333617	498973	220934	1.73721	0.0281274	1.11554	0.563089
sp|P06396|GELS_HUMAN	P06396	Gelsolin	79229.2	43722.6	75154.2	33183.7	68590.9	29923.6	0.948567	0.878477	0.865728	0.599878
sp|P13647|K2C5_HUMAN	P13647	Keratin, type II cytoskeletal 5	65420.8	67085.9	57408.8	44627.3	37705.5	22230.3	0.87753	1	0.576352	0.657405
sp|Q8TAX7|MUC7_HUMAN	Q8TAX7	Mucin-7	1.21683e+06	1.04365e+06	1.26883e+06	746722	2.52264e+06	3.27746e+06	1.04273	0.720901	2.07312	0.657405
sp|A8K2U0|A2ML1_HUMAN	A8K2U0	Alpha-2-macroglobulin-like protein ...	110383	102517	57675.4	35458.4	55175.5	44802.7	0.522501	0.328205	0.499853	0.237543
sp|P01024|CO3_HUMAN	P01024	Complement C3	97720.8	36303.6	152908	60287	162330	74397.1	1.56475	0.104895	1.66116	0.0203488
sp|P20160|CAP7_HUMAN	P20160	Azurocidin	247804	346024	407504	448386	284959	363217	1.64446	0.573737	1.14994	0.903892
sp|P02671|FIBA_HUMAN	P02671	Fibrinogen alpha chain	67644.2	71072.4	97823.8	84819.5	76023.3	57977.1	1.44615	0.441803	1.12387	0.544759
sp|P68871|HBB_HUMAN	P68871	Hemoglobin subunit beta	134304	141274	632346	1.29549e+06	222592	267450	4.70833	0.160528	1.65738	0.395041
sp|A0A075B6S5|KV127_HUMAN	A0A075B6S5	Immunoglobulin kappa variable 1-27	23326.8	17533.1	14183.3	9083.99	36175.8	27913.1	0.608027	0.328205	1.55082	0.442142
sp|P04075|ALDOA_HUMAN	P04075	Fructose-bisphosphate aldolase A	53516.7	25734.9	62533.3	11544.1	63190.9	24097.8	1.16848	0.188937	1.18077	0.395041
sp|P07737|PROF1_HUMAN	P07737	Profilin-1	54295.8	21541.8	86858.3	49905.3	69911.5	32519.4	1.59972	0.160528	1.2876	0.206001
sp|P13987|CD59_HUMAN	P13987	CD59 glycoprotein	70095.8	14604.2	70891.7	25216.4	94369.7	41031.5	1.01135	0.95913	1.3463	0.206001
sp|A0A0C4DH68|KV224_HUMAN	A0A0C4DH68	Immunoglobulin kappa variable 2-24	14840.9	12835.8	14126.4	11604.1	21213.5	23100	0.951856	0.95913	1.42939	0.777989
sp|P49913|CAMP_HUMAN	P49913	Cathelicidin antimicrobial peptide	221604	244318	457040	539942	311124	169665	2.06242	0.104895	1.40396	0.17737
sp|Q07654|TFF3_HUMAN	Q07654	Trefoil factor 3	346158	195463	191362	111414	257879	170129	0.552818	0.130381	0.744974	0.442142
sp|P11215|ITAM_HUMAN	P11215	Integrin alpha-M	64172.1	39975.4	52016.7	41061.5	36804.2	16064.2	0.810581	0.441803	0.573524	0.12884
sp|P59666|DEF3_HUMAN	P59666	Neutrophil defensin 3	23625000	1.87183e+07	3.96211e+07	2.64655e+07	3.58412e+07	2.16484e+07	1.67709	0.160528	1.51709	0.10865
sp|P01619|KV320_HUMAN	P01619	Immunoglobulin kappa variable 3-20	650300	421232	1414375	840095	1.88158e+06	1.44481e+06	2.17496	0.0498834	2.8934	0.00680056
sp|P08246|ELNE_HUMAN	P08246	Neutrophil elastase	740367	891789	1.87261e+06	1.38238e+06	1.73394e+06	2.27615e+06	2.5293	0.130381	2.342	0.237543
sp|P15153|RAC2_HUMAN	P15153	Ras-related C3 botulinum toxin subs...	120696	62120.7	133012	63690	132952	69299.3	1.10205	0.95913	1.10154	0.777989
sp|A0A0B4J1V0|HV315_HUMAN	A0A0B4J1V0	Immunoglobulin heavy variable 3-15	8486.08	8496.64	5229.62	3345.88	5136.74	4594.79	0.616259	0.878477	0.605314	0.544759
sp|P16401|H15_HUMAN	P16401	Histone H1.5	12974.8	5393.81	32298	30265.7	23683.3	36560.5	2.48929	0.505361	1.82533	0.385729
sp|P01717|LV325_HUMAN	P01717	Immunoglobulin lambda variable 3-25	90158.3	41999.7	99567.9	50679.5	159297	149376	1.10437	0.798446	1.76686	0.10865
sp|P17931|LEG3_HUMAN	P17931	Galectin-3	220292	150085	118354	47218.6	148270	105894	0.537261	0.0829837	0.673061	0.206001
sp|P22079|PERL_HUMAN	P22079	Lactoperoxidase	49495.8	21844.8	47816.7	35827.7	34877	13544.7	0.966075	0.441803	0.704645	0.17737
sp|P01782|HV309_HUMAN	P01782	Immunoglobulin heavy variable 3-9	140500	88132.3	246983	147861	237339	196933	1.75789	0.130381	1.68925	0.272287
sp|P0DOY3|IGLC3_HUMAN	P0DOY3	Immunoglobulin lambda constant 3	4.72417e+06	3.66301e+06	7.17467e+06	887305	8.52121e+06	2.98416e+06	1.51872	0.0379176	1.80375	0.0091027
sp|P31947|1433S_HUMAN	P31947	14-3-3 protein sigma	20199.7	11295	13457.6	5595.33	20042.4	12505.8	0.666228	0.441803	0.992213	0.903892
sp|P01701|LV151_HUMAN	P01701	Immunoglobulin lambda variable 1-51	70558.3	69541.2	90785.8	49700.4	159442	89342.1	1.28668	0.328205	2.25972	0.0506205
sp|P28325|CYTD_HUMAN	P28325	Cystatin-D	483410	337214	628067	642803	475668	393101	1.29924	1	0.983984	0.716784
sp|P60660|MYL6_HUMAN	P60660	Myosin light polypeptide 6	27412.5	13120.4	23135.4	11820.8	20336.4	15924.8	0.843973	0.278632	0.741865	0.310047
sp|P69905|HBA_HUMAN	P69905	Hemoglobin subunit alpha	10450.6	5762.9	35559.6	61097	14497.3	15540.8	3.40263	0.720901	1.38722	0.967849
sp|P31146|COR1A_HUMAN	P31146	Coronin-1A	46861.7	29386.5	51903.3	36430.2	45229.1	20901.1	1.10759	0.95913	0.965162	0.967849
sp|P25311|ZA2G_HUMAN	P25311	Zinc-alpha-2-glycoprotein	106812	37694.5	72983.3	48937.5	61497.3	27401.1	0.683285	0.104895	0.57575	0.0157445
sp|P01615|KVD28_HUMAN	P01615	Immunoglobulin kappa variable 2D-28	744833	628756	795762	171445	1.64221e+06	1.06032e+06	1.06838	0.278632	2.2048	0.0408827
sp|P09211|GSTP1_HUMAN	P09211	Glutathione S-transferase P	31659.6	25827.7	24629.2	7259.36	35277	19881.4	0.777937	0.95913	1.11426	0.544759
sp|P01700|LV147_HUMAN	P01700	Immunoglobulin lambda variable 1-47	152550	106947	209593	114847	303565	125342	1.37393	0.160528	1.98994	0.0157445
sp|P12814|ACTN1_HUMAN	P12814	Alpha-actinin-1	32851.2	16661.3	23536.2	9524.14	26379.8	12004.2	0.716449	0.234499	0.803009	0.395041
sp|P52209|6PGD_HUMAN	P52209	6-phosphogluconate dehydrogenase, d...	54775	30510	81554.2	34996.4	78521.2	46746.3	1.48889	0.160528	1.43352	0.442142
sp|P00338|LDHA_HUMAN	P00338	L-lactate dehydrogenase A chain	48175	15411.2	48408.3	13819.7	39666.7	13664.7	1.00484	0.878477	0.823387	0.351062
sp|P04080|CYTB_HUMAN	P04080	Cystatin-B	76875.4	53225.1	49184.6	19169.7	50414.2	31679.4	0.639796	0.328205	0.655791	0.272287
sp|P29401|TKT_HUMAN	P29401	Transketolase	42535.8	26637.5	37872.5	12731.3	38014.2	20049.4	0.890367	0.878477	0.893699	0.840385
sp|P10599|THIO_HUMAN	P10599	Thioredoxin	157221	68513.8	108371	34649.1	139227	67414.2	0.689291	0.278632	0.885552	0.657405
sp|P06312|KV401_HUMAN	P06312	Immunoglobulin kappa variable 4-1	86779.6	48751.9	69833.3	40722.2	70983.3	86465	0.804721	0.505361	0.817973	0.237543
sp|P31997|CEAM8_HUMAN	P31997	Carcinoembryonic antigen-related ce...	124158	104369	84712.5	61735	86890.9	45400.3	0.682294	0.645377	0.69984	0.840385
sp|P08133|ANXA6_HUMAN	P08133	Annexin A6	41945	36459.9	36250	31975.6	16982.4	5983.95	0.864227	0.645377	0.404874	0.0620253
sp|P0DP03|HVC05_HUMAN	P0DP03	Immunoglobulin heavy variable 3-30-...	63590.8	50241.5	57955.4	13679.3	79222.1	53188.5	0.91138	0.720901	1.24581	0.442142
sp|P17213|BPI_HUMAN	P17213	Bactericidal permeability-increasin...	15248.8	9790.5	18478	12026.9	13217	6816.05	1.21177	0.720901	0.866758	0.716784
sp|P09228|CYTT_HUMAN	P09228	Cystatin-SA	105069	81894.9	26037.5	10928.2	36968.2	43058.3	0.247814	0.00699301	0.351848	0.0091027
sp|P31025|LCN1_HUMAN	P31025	Lipocalin-1	73169.6	54542.6	27780.4	34947.7	26621.5	22670	0.379672	0.0498834	0.363833	0.0259321
sp|Q01469|FABP5_HUMAN	Q01469	Fatty acid-binding protein 5	55129.3	46252.5	33744	11392	58007.5	40651.5	0.612089	0.278632	1.05221	0.967849
sp|P04259|K2C6B_HUMAN	P04259	Keratin, type II cytoskeletal 6B	37263.7	44042.5	12752.1	6092.6	22340.9	16787.1	0.342211	0.194872	0.599535	0.351062
sp|A0A0C4DH25|KVD20_HUMAN	A0A0C4DH25	Immunoglobulin kappa variable 3D-20	9383.96	7011.58	6527.21	5503.11	4633.61	3362.35	0.695571	0.382284	0.493779	0.10865
sp|P01602|KV105_HUMAN	P01602	Immunoglobulin kappa variable 1-5	160004	91658.1	188112	55696.8	241573	114698	1.17567	0.278632	1.50979	0.10865
sp|P01594|KV133_HUMAN	P01594	Immunoglobulin kappa variable 1-33	48125.8	48283	26633.3	13717.7	38018.2	21678.3	0.55341	0.441803	0.789975	1
sp|P80748|LV321_HUMAN	P80748	Immunoglobulin lambda variable 3-21	80083.3	84127.3	90719.6	50839.8	100867	39034.1	1.13281	0.234499	1.25952	0.10865
sp|P19105|ML12A_HUMAN	P19105	Myosin regulatory light chain 12A	44552.1	32364	26591.2	16302.8	23239.4	15528.7	0.596858	0.328205	0.521623	0.151756
sp|P01714|LV319_HUMAN	P01714	Immunoglobulin lambda variable 3-19	108092	69108.2	121804	38938.1	135176	55707.2	1.12686	0.441803	1.25057	0.272287
sp|P54108|CRIS3_HUMAN	P54108	Cysteine-rich secretory protein 3	63816.7	21888.5	43359.2	11668.8	50169.7	23493.7	0.679433	0.160528	0.786154	0.17287
sp|Q6P5S2|LEG1H_HUMAN	Q6P5S2	Protein LEG1 homolog	110700	54453.9	111989	49042.5	76860.6	48203	1.01165	1	0.694314	0.17737
sp|P15814|IGLL1_HUMAN	P15814	Immunoglobulin lambda-like polypept...	923958	939448	1.05827e+06	352825	1.58103e+06	736832	1.14537	0.0829837	1.71115	0.0408827
sp|P06733|ENOA_HUMAN	P06733	Alpha-enolase	14828.2	12456.2	7571.88	3850.52	6091.21	2529.81	0.51064	0.130381	0.410785	0.0120664
sp|P11169|GTR3_HUMAN	P11169	Solute carrier family 2, facilitate...	28819.6	20637.7	23565.4	18978.7	27312.7	21107	0.817688	0.720901	0.947714	0.967849
sp|A0A0B4J1U7|HV601_HUMAN	A0A0B4J1U7	Immunoglobulin heavy variable 6-1	13205	8590.72	16729.2	5202.91	26746.7	17211.2	1.26688	0.104895	2.0255	0.0327591
sp|P31949|S10AB_HUMAN	P31949	Protein S100-A11	105658	55751.4	83235.4	53734.3	105462	64581.6	0.787779	0.328205	0.99814	0.967849
sp|Q5TZA2|CROCC_HUMAN	Q5TZA2	Rootletin	20656.3	16593.3	15368.3	5528.56	26516	46294	0.743999	0.645377	1.28367	0.657405
sp|P07477|TRY1_HUMAN	P07477	Trypsin-1	56082.5	69721	15972.5	9080.94	11198.7	4720.53	0.284804	0.130381	0.199683	0.0327591
sp|P10412|H14_HUMAN	P10412	Histone H1.4	25243.8	15534.2	53147.5	52266.7	45775.3	74298.4	2.10537	0.645377	1.81333	0.777989
sp|P02654|APOC1_HUMAN	P02654	Apolipoprotein C-I	37341.2	45588.7	12577.2	6050.34	16542.4	9784.56	0.336817	0.130381	0.443007	0.206001
sp|A0A075B6I9|LV746_HUMAN	A0A075B6I9	Immunoglobulin lambda variable 7-46	99016.7	60608	215408	111847	303848	208289	2.17548	0.0206682	3.06866	0.00497473
sp|P32926|DSG3_HUMAN	P32926	Desmoglein-3	8892.58	11160.2	4970.21	2641.33	3739.03	1237.46	0.558916	0.573737	0.420466	0.442142
sp|P30041|PRDX6_HUMAN	P30041	Peroxiredoxin-6	92188.8	101136	33142.1	14524	40187.1	22108.4	0.359502	0.160528	0.435922	0.206001
sp|P27105|STOM_HUMAN	P27105	Stomatin	13353.3	8565.3	9512.25	9969.81	8667.88	4846.88	0.71235	0.382284	0.649117	0.310047
sp|P28676|GRAN_HUMAN	P28676	Grancalcin	51766.5	39907.5	56953.9	45132.4	42845.2	29612.1	1.10021	0.95913	0.827662	1
sp|P04899|GNAI2_HUMAN	P04899	Guanine nucleotide-binding protein ...	17755	9212.71	22764.2	12204	15765.8	9453.32	1.28213	0.573737	0.887962	0.777989
sp|P80511|S10AC_HUMAN	P80511	Protein S100-A12	2837.12	1513.73	1990.46	1309.46	3376.67	3726.17	0.701576	0.234499	1.19017	0.840385
sp|P24158|PRTN3_HUMAN	P24158	Myeloblastin	17846.6	35090.1	2926.38	1473.97	3702.82	2882.72	0.163974	0.0829837	0.20748	0.215298
sp|P21926|CD9_HUMAN	P21926	CD9 antigen	23186.2	31533.1	6664.71	2469.18	5391.52	4873.94	0.287442	0.441803	0.232531	0.0506205
sp|P06310|KV230_HUMAN	P06310	Immunoglobulin kappa variable 2-30	39033.2	61751.6	16554.5	8350.52	15833.2	9384.12	0.424114	0.645377	0.405635	0.657405
sp|P06870|KLK1_HUMAN	P06870	Kallikrein-1	28785	22572.4	33015.8	21611.2	40428	21632.5	1.14698	0.645377	1.40448	0.151756
sp|A0A075B6I0|LV861_HUMAN	A0A075B6I0	Immunoglobulin lambda variable 8-61	38644.6	20500.2	75643.3	49637.6	61965.5	35659.6	1.95741	0.0829837	1.60347	0.206001
sp|P04432|KVD39_HUMAN	P04432	Immunoglobulin kappa variable 1D-39	16318.6	11113.3	24052.1	12440.6	20268.5	17380.1	1.47391	0.194872	1.24205	0.777989
sp|P01034|CYTC_HUMAN	P01034	Cystatin-C	39959.2	25597.7	30562.9	12476.6	29502.7	16037.2	0.764854	0.645377	0.738322	0.544759
sp|Q9HCM2|PLXA4_HUMAN	Q9HCM2	Plexin-A4	3402.08	1843.82	3606.33	2897.03	5430.55	3273.03	1.06004	0.878477	1.59624	0.151756
sp|A0A075B6H9|LV469_HUMAN	A0A075B6H9	Immunoglobulin lambda variable 4-69	26547.5	13989.7	40732.1	14468	46333.6	23327.3	1.53431	0.0498834	1.74531	0.0327591
sp|Q9UBG3|CRNN_HUMAN	Q9UBG3	Cornulin	23634.6	20437	9388.17	5628.21	19537.3	18717.3	0.397222	0.104895	0.826639	0.840385
sp|P0DP08|HVD82_HUMAN	P0DP08	Immunoglobulin heavy variable 4-38-...	39217.5	29164.7	49048.3	34198.3	30926.7	13564.4	1.25067	0.720901	0.788594	0.967849
sp|P61586|RHOA_HUMAN	P61586	Transforming protein RhoA	23885	17342.2	23398.2	14689.3	24398.6	13166.6	0.979619	0.95913	1.0215	0.903892
sp|A0A0B4J1X5|HV374_HUMAN	A0A0B4J1X5	Immunoglobulin heavy variable 3-74	215712	167104	323596	220879	414997	372492	1.50013	0.194872	1.92384	0.10865
sp|O43490|PROM1_HUMAN	O43490	Prominin-1	30067.9	39753.4	11437	5251.07	5715.09	2735.79	0.380371	0.194872	0.190073	0.0203488
sp|Q6MZM9|PRR27_HUMAN	Q6MZM9	Proline-rich protein 27	144183	92730.1	193110	237911	162648	167555	1.33934	0.645377	1.12807	0.716784
sp|P30740|ILEU_HUMAN	P30740	Leukocyte elastase inhibitor	14631.2	12988.4	13899.2	7511.17	9567.64	3858.87	0.94997	0.878477	0.653922	0.967849
sp|P17693|HLAG_HUMAN	P17693	HLA class I histocompatibility anti...	12990.9	8946.25	4722.42	2188.7	4413.48	3713.77	0.363517	0.014763	0.339736	0.0157445
sp|P04433|KV311_HUMAN	P04433	Immunoglobulin kappa variable 3-11	6329.38	4600.12	200282	551440	6436.24	4049.37	31.6433	1	1.01688	0.777989
sp|A0A087WSY6|KVD15_HUMAN	A0A087WSY6	Immunoglobulin kappa variable 3D-15	22262.1	12425.4	15079.2	7769.63	25914.5	12658.2	0.677349	0.278632	1.16407	0.840385
sp|P23083|HV102_HUMAN	P23083	Immunoglobulin heavy variable 1-2	212375	148426	335383	82916.3	377112	302673	1.5792	0.0404213	1.77569	0.0908417
sp|P0DP09|KV113_HUMAN	P0DP09	Immunoglobulin kappa variable 1-13	23506.1	17410.2	21055	7670.49	26091.2	27852.9	0.895726	1	1.10997	0.967849
sp|Q9HD89|RETN_HUMAN	Q9HD89	Resistin	17391.7	9337.98	13916	8923.03	12027.5	10863.7	0.800156	0.382284	0.691564	0.151756
sp|Q02487|DSC2_HUMAN	Q02487	Desmocollin-2	14471	9073.4	10483.2	8780.18	10037.7	6802.36	0.724428	0.382284	0.693642	0.310047
sp|Q14210|LY6D_HUMAN	Q14210	Lymphocyte antigen 6D	19704.6	8998.81	15462.4	12699.7	36920.9	30687.2	0.784712	0.234499	1.87372	0.272287
sp|P62937|PPIA_HUMAN	P62937	Peptidyl-prolyl cis-trans isomerase...	4076.33	1010.49	4243.67	1914.54	3946.58	1595.02	1.04105	0.95913	0.968168	0.544759
sp|P01599|KV117_HUMAN	P01599	Immunoglobulin kappa variable 1-17	37202.1	51430.6	29913.3	18516.1	23477.6	19119.8	0.804077	0.505361	0.631082	0.967849
sp|P06703|S10A6_HUMAN	P06703	Protein S100-A6	99037.5	61798.8	84971.3	36303	104991	63445.3	0.85797	1	1.06011	0.903892
sp|O95835|LATS1_HUMAN	O95835	Serine/threonine-protein kinase LAT...	18365.1	22255	5484.58	3287.93	4547.64	1329.14	0.298642	0.328205	0.247624	0.237543
sp|P01860|IGHG3_HUMAN	P01860	Immunoglobulin heavy constant gamma...	23397.5	16551.5	81639.2	41025.5	91275.8	50306.6	3.48923	0.0018648	3.90109	0.00079384
sp|P04430|KV116_HUMAN	P04430	Immunoglobulin kappa variable 1-16	8407.92	9084.87	6423.71	2631.15	4683.91	2412.46	0.764007	0.798446	0.557083	0.351062
sp|P52566|GDIR2_HUMAN	P52566	Rho GDP-dissociation inhibitor 2	7440.54	5460.23	8577.54	6406.32	7699.79	4825.59	1.15281	0.720901	1.03484	0.967849
sp|Q9UBC9|SPRR3_HUMAN	Q9UBC9	Small proline-rich protein 3	311604	332085	84514.6	66902.4	143034	109067	0.271224	0.0379176	0.459024	0.237543
sp|P63104|1433Z_HUMAN	P63104	14-3-3 protein zeta/delta	4443.21	2736.71	4563.17	3422.85	5403.64	5269.56	1.027	0.573737	1.21616	0.903892
57 concordant differentially expressed proteins
proteins dysregulated in pSS patients with respect to controls, with an FC higher than 1.5 or lower than 1/1.5 and statistical significance set at p < 0.05 (8)
proteins dysregulated in SSA+ patients with respect to controls, with an FC higher than 1.5 or lower than 1/1.5 and statistical significance set at p < 0.05 (7)
proteins dysregulated both in pSS and SSA+ patients with respect to controls, with an FC higher than 1.5 or lower than 1/1.5 and statistical significance set at p < 0.05 (11)
